**Table S1.** Diffusion metrics (fractional anisotropy and mean diffusivity)

| Region of interest                | Fractional anisotropy |       |                 |       |              | Mean diffusivity ( $\times 10^{-3}$ mm <sup>2</sup> /s) |       |                 |       |          |
|-----------------------------------|-----------------------|-------|-----------------|-------|--------------|---------------------------------------------------------|-------|-----------------|-------|----------|
|                                   | NSLBP (n= 18)         |       | Control (n= 18) |       | <i>p</i>     | NSLBP (n= 18)                                           |       | Control (n= 18) |       | <i>p</i> |
|                                   | M                     | SD    | M               | SD    |              | M                                                       | SD    | M               | SD    |          |
| Anterior limb internal capsule L  | 0.489                 | 0.028 | 0.482           | 0.034 | 0.545        | 0.664                                                   | 0.024 | 0.661           | 0.012 | 0.680    |
| Anterior limb internal capsule R  | 0.506                 | 0.032 | 0.503           | 0.029 | 0.788        | 0.656                                                   | 0.022 | 0.651           | 0.025 | 0.482    |
| Cerebral peduncle L               | 0.635                 | 0.027 | 0.618           | 0.033 | 0.099        | 0.759                                                   | 0.024 | 0.767           | 0.019 | 0.240    |
| Cerebral peduncle R               | 0.627                 | 0.029 | 0.622           | 0.032 | 0.625        | 0.753                                                   | 0.024 | 0.752           | 0.024 | 0.878    |
| Corticospinal tract L             | 0.514                 | 0.024 | 0.525           | 0.028 | 0.213        | 0.694                                                   | 0.023 | 0.699           | 0.025 | 0.515    |
| Corticospinal tract R             | 0.515                 | 0.031 | 0.510           | 0.027 | 0.645        | 0.678                                                   | 0.022 | 0.685           | 0.019 | 0.341    |
| Inferior cerebellar peduncle L    | 0.496                 | 0.023 | 0.482           | 0.032 | 0.150        | 0.714                                                   | 0.035 | 0.718           | 0.027 | 0.708    |
| Inferior cerebellar peduncle R    | 0.498                 | 0.025 | 0.483           | 0.024 | 0.090        | 0.703                                                   | 0.027 | 0.716           | 0.020 | 0.103    |
| Medial lemniscus L                | 0.537                 | 0.034 | 0.527           | 0.037 | 0.402        | 0.718                                                   | 0.032 | 0.724           | 0.029 | 0.541    |
| Medial lemniscus R                | 0.547                 | 0.031 | 0.531           | 0.028 | 0.101        | 0.727                                                   | 0.036 | 0.730           | 0.031 | 0.768    |
| Middle cerebellar peduncle        | 0.481                 | 0.019 | 0.478           | 0.011 | 0.540        | 0.732                                                   | 0.032 | 0.749           | 0.039 | 0.157    |
| Posterior limb internal capsule L | 0.632                 | 0.019 | 0.630           | 0.020 | 0.763        | 0.640                                                   | 0.014 | 0.638           | 0.010 | 0.795    |
| Posterior limb internal capsule R | 0.641                 | 0.019 | 0.634           | 0.018 | 0.228        | 0.629                                                   | 0.023 | 0.633           | 0.018 | 0.497    |
| Posterior thalamic radiation L    | 0.552                 | 0.026 | 0.551           | 0.022 | 0.903        | 0.735                                                   | 0.045 | 0.740           | 0.029 | 0.680    |
| Posterior thalamic radiation R    | 0.555                 | 0.021 | 0.554           | 0.022 | 0.923        | 0.726                                                   | 0.029 | 0.723           | 0.026 | 0.753    |
| Superior cerebellar peduncle L    | 0.517                 | 0.039 | 0.543           | 0.035 | <b>0.039</b> | 1.078                                                   | 0.132 | 1.021           | 0.103 | 0.155    |
| Superior cerebellar peduncle R    | 0.521                 | 0.414 | 0.532           | 0.032 | 0.366        | 1.089                                                   | 0.133 | 1.053           | 0.107 | 0.374    |
