**Table S2.** Diffusion metrics (axial diffusivity and radial diffusivity)

| Region of interest                       | Axial diffusivity ( $\times 10^{-3}$ mm <sup>2</sup> /s) |       |                 |       |          | Radial diffusivity ( $\times 10^{-3}$ mm <sup>2</sup> /s) |       |                 |       |          |
|------------------------------------------|----------------------------------------------------------|-------|-----------------|-------|----------|-----------------------------------------------------------|-------|-----------------|-------|----------|
|                                          | NSLBP (n= 18)                                            |       | Control (n= 18) |       | <i>p</i> | NSLBP (n= 18)                                             |       | Control (n= 18) |       | <i>p</i> |
|                                          | M                                                        | SD    | M               | SD    |          | M                                                         | SD    | M               | SD    |          |
| <b>Anterior limb internal capsule L</b>  | 1.069                                                    | 0.040 | 1.060           | 0.029 | 0.428    | 0.461                                                     | 0.027 | 0.462           | 0.024 | 0.932    |
| <b>Anterior limb internal capsule R</b>  | 1.079                                                    | 0.035 | 1.066           | 0.037 | 0.280    | 0.445                                                     | 0.027 | 0.443           | 0.029 | 0.837    |
| <b>Cerebral peduncle L</b>               | 1.389                                                    | 0.054 | 1.380           | 0.039 | 0.541    | 0.443                                                     | 0.030 | 0.461           | 0.033 | 0.101    |
| <b>Cerebral peduncle R</b>               | 1.368                                                    | 0.050 | 1.359           | 0.057 | 0.615    | 0.446                                                     | 0.030 | 0.449           | 0.028 | 0.783    |
| <b>Corticospinal tract L</b>             | 1.123                                                    | 0.050 | 1.144           | 0.040 | 0.175    | 0.480                                                     | 0.024 | 0.477           | 0.030 | 0.770    |
| <b>Corticospinal tract R</b>             | 1.098                                                    | 0.035 | 1.101           | 0.037 | 0.778    | 0.468                                                     | 0.031 | 0.477           | 0.026 | 0.392    |
| <b>Inferior cerebellar peduncle L</b>    | 1.135                                                    | 0.047 | 1.130           | 0.041 | 0.761    | 0.504                                                     | 0.035 | 0.512           | 0.032 | 0.474    |
| <b>Inferior cerebellar peduncle R</b>    | 1.125                                                    | 0.037 | 1.131           | 0.028 | 0.621    | 0.492                                                     | 0.030 | 0.509           | 0.026 | 0.075    |
| <b>Medial lemniscus L</b>                | 1.200                                                    | 0.051 | 1.199           | 0.061 | 0.971    | 0.477                                                     | 0.036 | 0.487           | 0.032 | 0.393    |
| <b>Medial lemniscus R</b>                | 1.218                                                    | 0.053 | 1.206           | 0.060 | 0.502    | 0.481                                                     | 0.040 | 0.492           | 0.028 | 0.327    |
| <b>Middle cerebellar peduncle</b>        | 1.142                                                    | 0.039 | 1.162           | 0.055 | 0.225    | 0.527                                                     | 0.032 | 0.543           | 0.033 | 0.156    |
| <b>Posterior limb internal capsule L</b> | 1.180                                                    | 0.031 | 1.179           | 0.031 | 0.919    | 0.369                                                     | 0.016 | 0.368           | 0.015 | 0.835    |
| <b>Posterior limb internal capsule R</b> | 1.174                                                    | 0.039 | 1.175           | 0.028 | 0.946    | 0.356                                                     | 0.020 | 0.363           | 0.019 | 0.324    |
| <b>Posterior thalamic radiation L</b>    | 1.237                                                    | 0.050 | 1.249           | 0.039 | 0.421    | 0.484                                                     | 0.049 | 0.486           | 0.032 | 0.891    |
| <b>Posterior thalamic radiation R</b>    | 1.233                                                    | 0.054 | 1.231           | 0.040 | 0.917    | 0.473                                                     | 0.026 | 0.469           | 0.027 | 0.695    |
| <b>Superior cerebellar peduncle L</b>    | 1.699                                                    | 0.144 | 1.667           | 0.117 | 0.468    | 0.768                                                     | 0.130 | 0.698           | 0.101 | 0.081    |
| <b>Superior cerebellar peduncle R</b>    | 1.721                                                    | 0.135 | 1.696           | 0.124 | 0.565    | 0.773                                                     | 0.137 | 0.731           | 0.103 | 0.308    |
